# Supplementary material for: Hyponatremia Promotes Cancer Growth in a Murine Xenograft Model of Neuroblastoma
Source: MDPI journal article supplement (doi:10.3390/ijms242316680), 2023-11-23
Supplement: s1 [file s1]

## Supplementary Materials

**Table S1.** Tumor volume (mm<sup>3</sup>) in control and hyponatremic mice, as measured at different time points. Results are expressed as mean  $\pm$  SE.

|                                       | T0               | T3                | T6               | T10               | T12               | T14                 | T20                 | T22                | T26                 | T28                |
|---------------------------------------|------------------|-------------------|------------------|-------------------|-------------------|---------------------|---------------------|--------------------|---------------------|--------------------|
| control group (mm <sup>3</sup> )      | 60.4 $\pm$ 123.7 | 106.5 $\pm$ 22.38 | 233.7 $\pm$ 64.8 | 576.5 $\pm$ 242.5 | 807.5 $\pm$ 308.4 | 1197.03 $\pm$ 525.3 | 1543.2 $\pm$ 402.5  | 1806.9 $\pm$ 577.8 | 1790.6 $\pm$ 303.2  | 2509.4 $\pm$ 405.9 |
| hyponatremic group (mm <sup>3</sup> ) | 44.8 $\pm$ 7.15  | 119.7 $\pm$ 32.6  | 286.6 $\pm$ 77.2 | 627.8 $\pm$ 257.6 | 979.3 $\pm$ 336.4 | 2136.8 $\pm$ 988.03 | 2678.1 $\pm$ 631.06 | 3164.7 $\pm$ 839.3 | 2795.03 $\pm$ 623.2 | 3692.5 $\pm$ 817.7 |

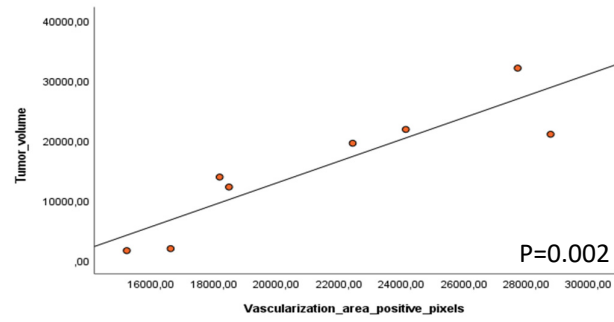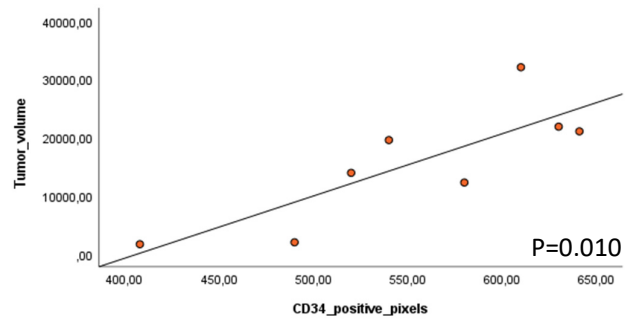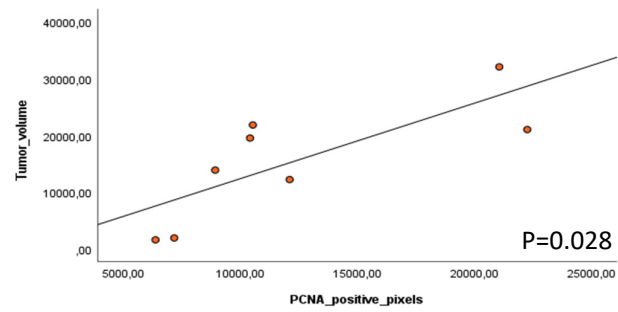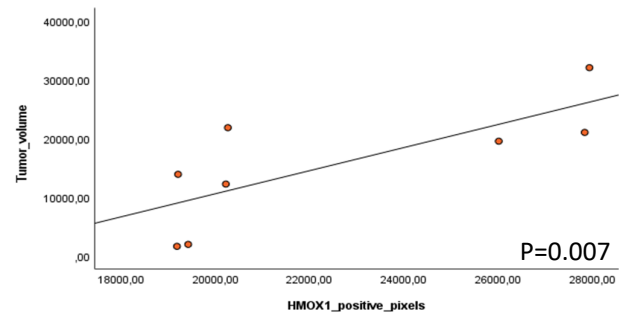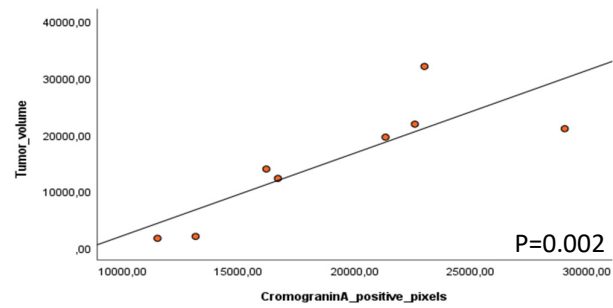

(a)

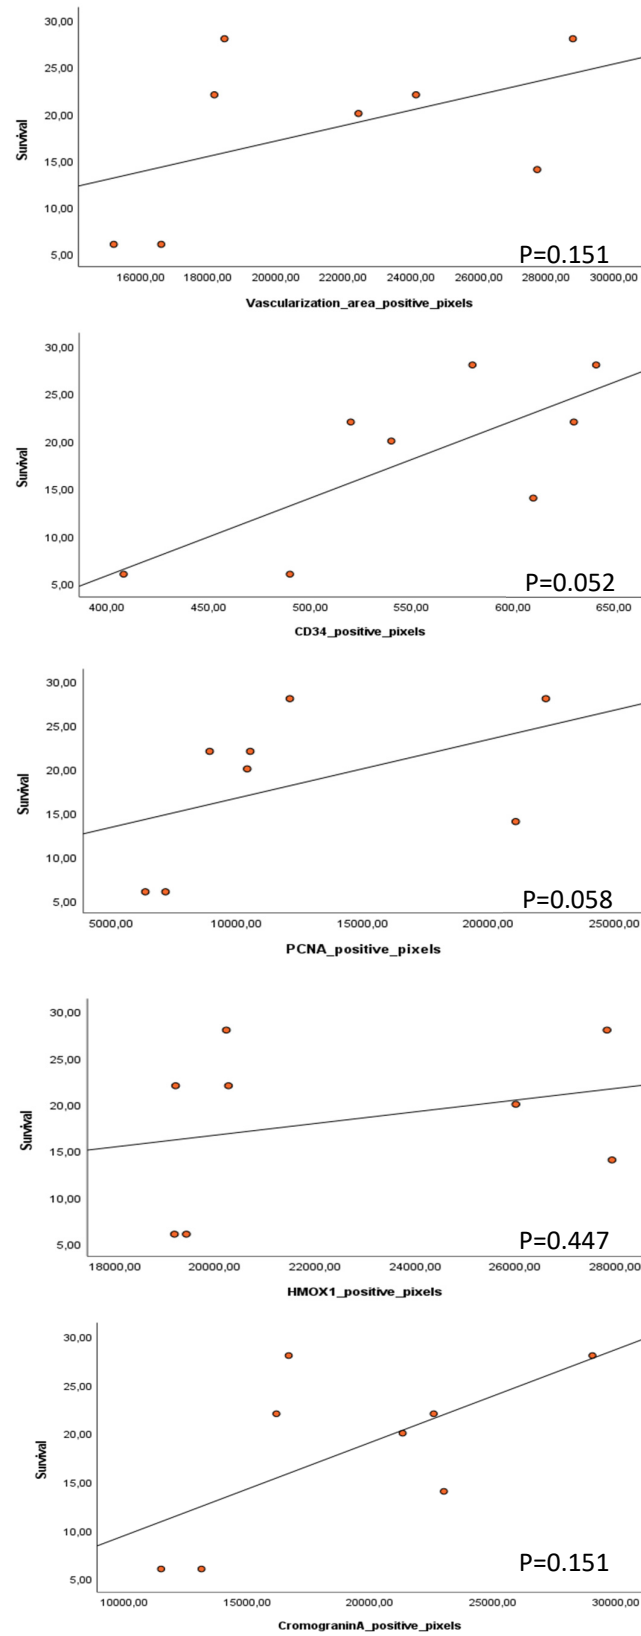

(b)

**Figure S1 (a).** Correlation analysis between tumor volume and histological markers; **(b)** correlation analysis between survival and histological markers.
